# Supplementary material
Source: PubMed Central journal article supplement (PMC10991563)
Supplement: 262_2021_3058_MOESM1_ESM.pdf [file 262_2021_3058_MOESM1_ESM.pdf]

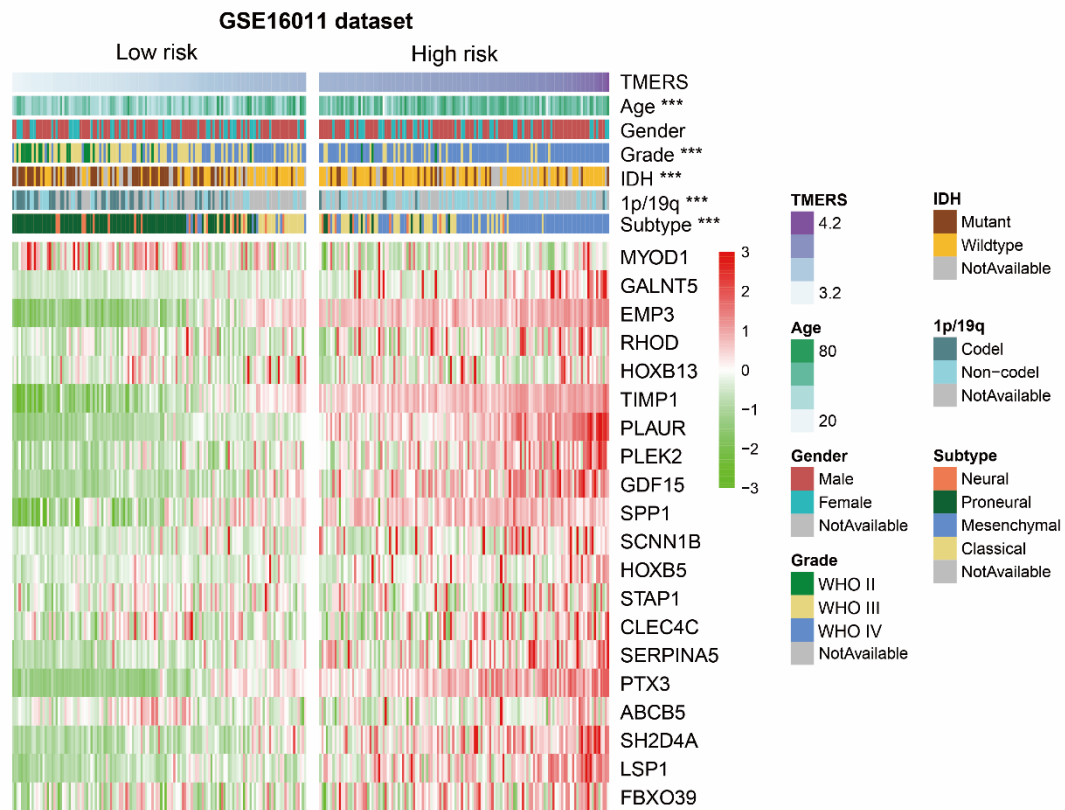

**Figure S1. Heatmap and clinicopathological features of TMERS-low and TMERS-high group in GSE16011 dataset. \*\*\*P < 0.001.**

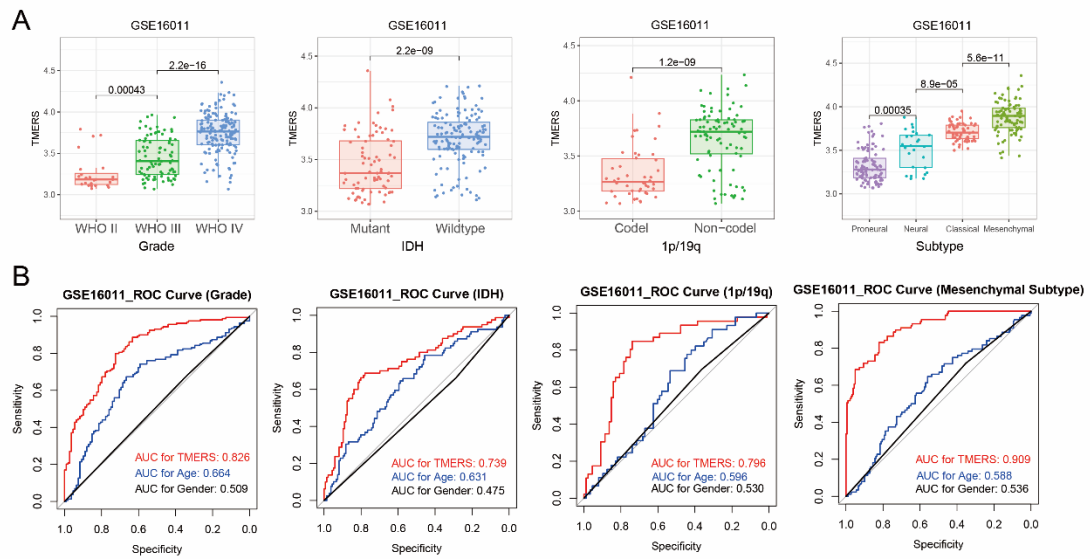

**Figure S2. Associations between TMERS and pathological features in GSE16011 dataset. (A)** Patients were grouped by WHO grade, IDH mutation status, 1p/19q codeletion status, TCGA molecular subtype. **(B)** The ROC curve evaluated the predictive value of TMERS in pathological features.

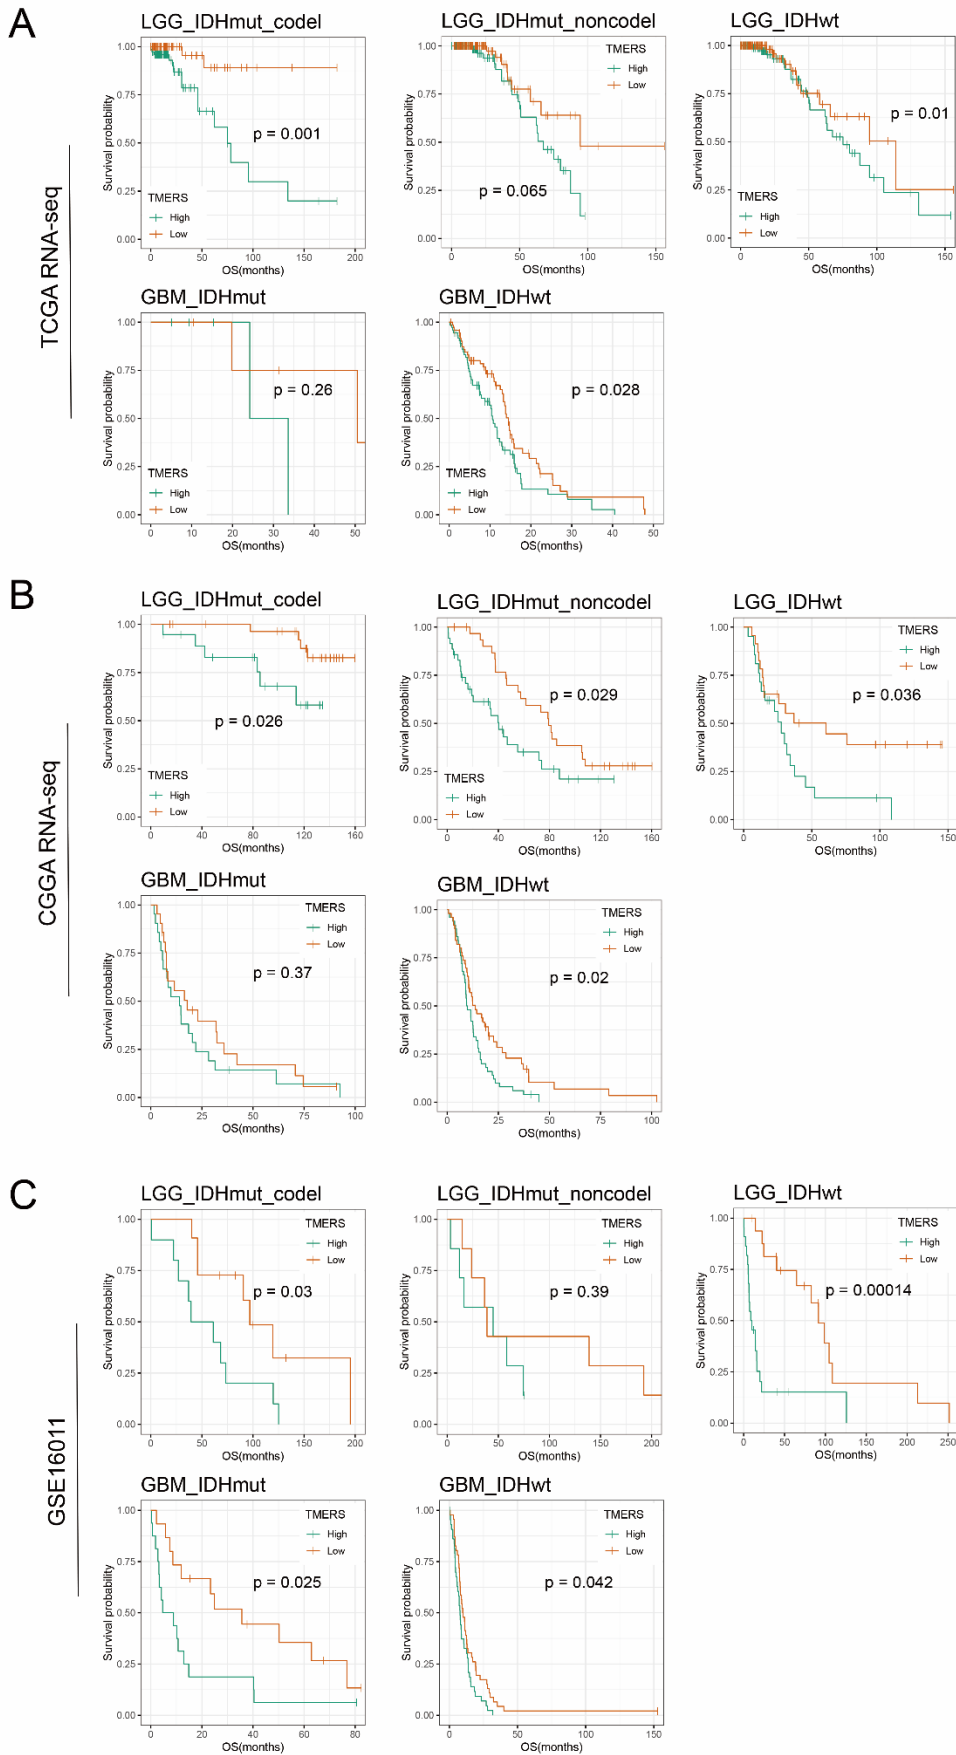

**Figure S3. Clinical prognostic value of TMERS.** Overall survival prediction of the TMERS in

LGG with IDH-mutant and 1p/19q-codeleted, LGG with IDH-mutant and 1p/19q-intact, LGG with IDH-wildtype, GBM with IDH-mutant, GBM with IDH-wildtype in TCGA dataset (**A**), CGGA dataset (**B**) and GSE16011 dataset (**C**). Survival difference was determined by a log-rank test.

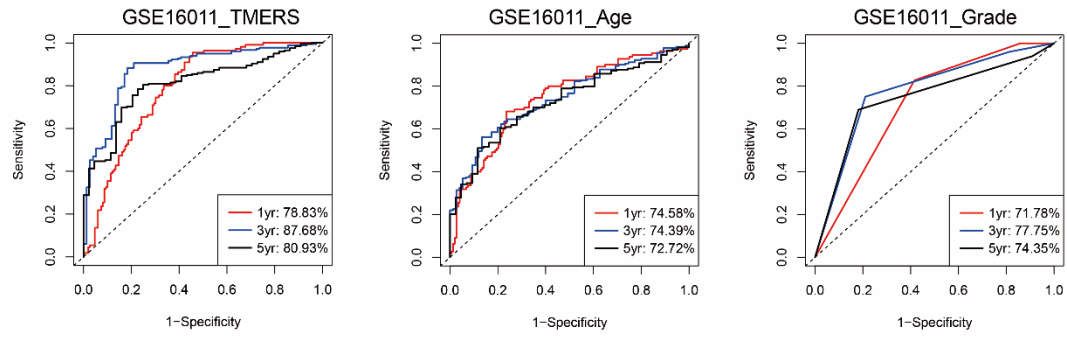

**Figure S4. Predictive value of TMERS, age and grade for overall survival in GSE16011 dataset.**

(A) 1-year, 3-year and 5-year ROC curves indicated the sensitivity and specificity of TMERS, age and grade in GSE16011 dataset.

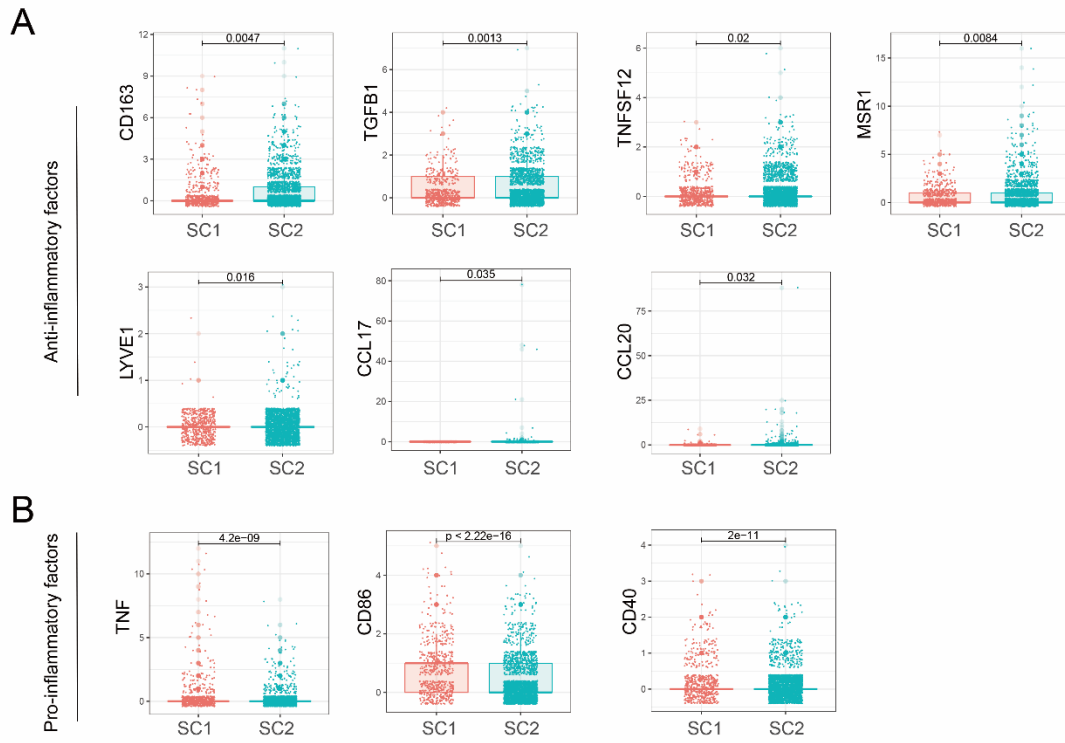

**Figure S5. Phenotypic analysis of macrophages in two single-cell sequencing samples. (A)** Expression levels of anti-inflammatory factors in macrophages. **(B)** Expression levels of pro-inflammatory factors in macrophages.
